# Supplementary material for: Bionanocellulose/Poly(Vinyl Alcohol) Composites Produced by In-Situ Method and Ex-Situ/Impregnation or Sterilization Methods
Source: MDPI journal article supplement (doi:10.3390/ma14216340), 2021-10-23
Supplement: s1 [file s1]

Article

# Bionanocellulose/Poly(Vinyl Alcohol) Composites Produced by *In-Situ* Method and *Ex-Situ*/Impregnation or Sterilization Methods

Aldona Długa <sup>1</sup>, Jolanta Kowalonek <sup>2,\*</sup> and Halina Kaczmarek <sup>2</sup>

<sup>1</sup> Bowil Biotech Sp. z o.o., 7 Skandynawska St., 84-120 Władysławowo, Poland; dluga\_alдона@wpl.pl

<sup>2</sup> Faculty of Chemistry, Nicolaus Copernicus University in Toruń, 7 Gagarina St., 87-100 Toruń, Poland; halina@umk.pl

\* Correspondence: jolak@umk.pl; Tel.: +48-56-6114-552

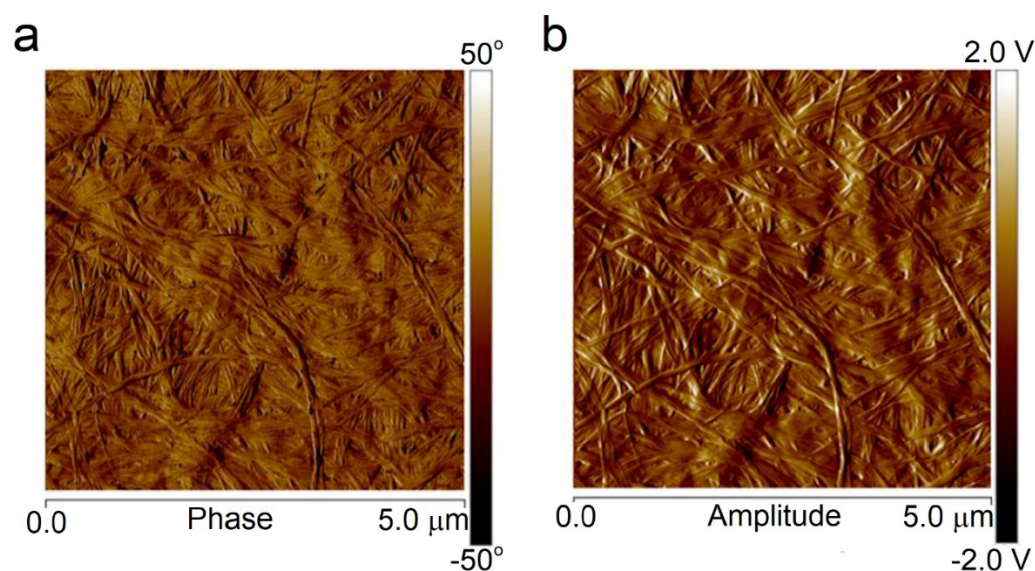

**Figure S1.** 2D-AFM images of BNC: phase (a), amplitude (b).

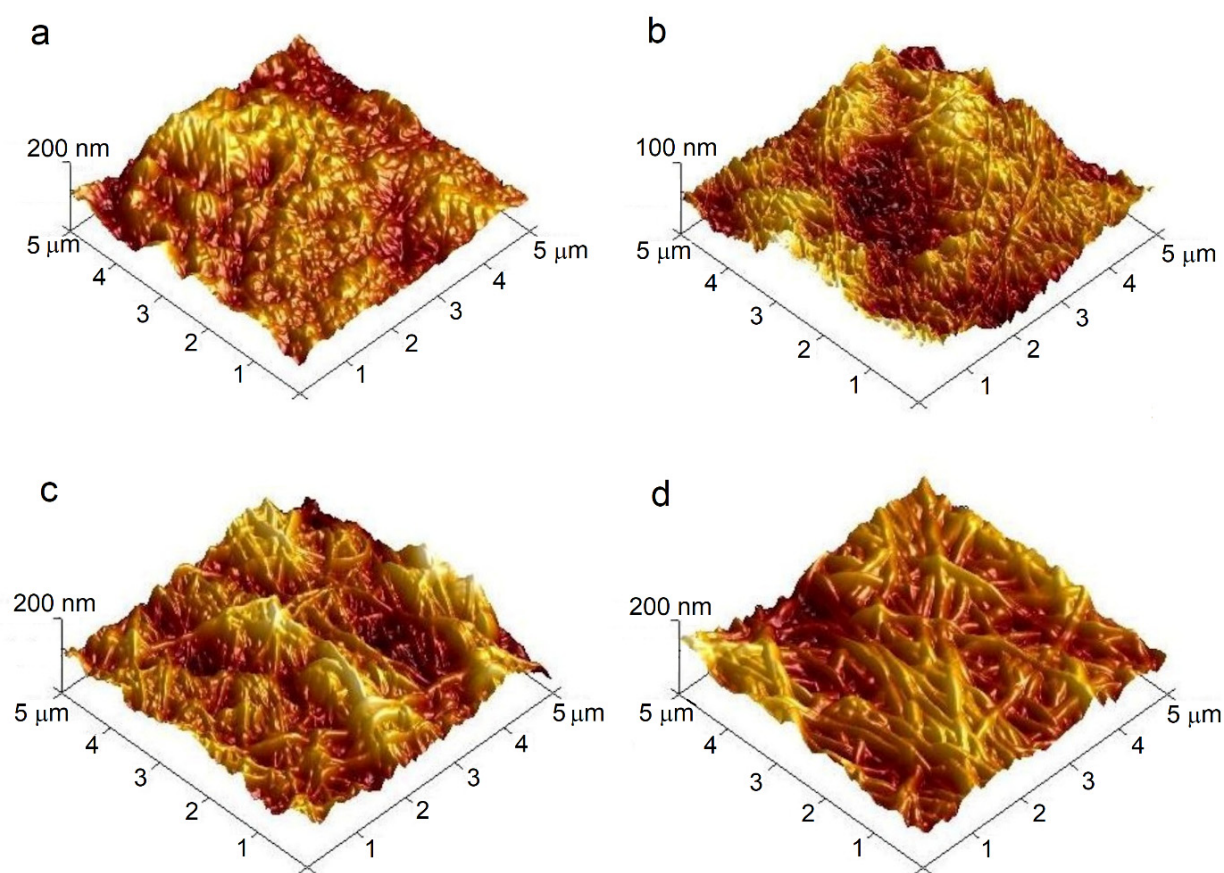

**Figure S2.** 3D-AFM images of BNC (a) and BNC/PVA composites obtained by *in-situ* (b), *ex-situ*/impregnation (c) and *ex-situ*/sterilization (d) method (at 4% PVA).
